# Supplementary material for: Exploring the nature of the gender-congruency effect: implicit gender activation and social bias
Source: Front Psychol. 2023 May 23;14:1160836. doi: 10.3389/fpsyg.2023.1160836 (PMC10242114; doi:10.3389/fpsyg.2023.1160836)
Supplement: Supplementary file 1 [file Data_Sheet_1.xlsx]

## Sheet: BEM
Instrucciones: Selecciona una sola respuesta para cada uno de los siguientes reactivos para indicar hasta qué punto te describe cada uno de los siguientes adjetivos, donde 1 corresponde a nunca o a casi nunca y 7 a siempre o a casi siempre:
Autodependiente
Complaciente
Dispuest@ a ayudar
Defiende sus creencias
Alegre
Malhumorad@
Independiente
Tímid@
Preocupad@
Activ@
Afectad@
Teatral
Autoritari@
Que admite la adulación
Feliz
Con fuerte personalidad
Leal
Impredecible
Fuerte
Femenin@
En quien se puede confiar
Analític@
Que entiende la situación de los demás
Celos@
Con capacidad para liderar
Sensible a las necesidades ajenas
Veraz
Deseos@ de correr riesgos
Comprensiv@
Que mantiene todo en secreto
Con facilidad para tomar decisiones
Compasiv@
Sincer@
Autosuficiente
Dispuest@ a calmar los sentimientos dañados
Engreíd@
Dominante
De voz suave
Que gusta a los demás
Masculin@
Cálid@
Solemne
Dispuest@ a hacerse escuchar
Tiern@
Amigable
Agresiv@
Ingenu@
Ineficaz
Que actúa como líder
Infantil
Adaptable
Individualista
Que no emplea un lenguaje duro
Que no es sistemátic@
Competitiv@
Que le gustan los niños
Cuidados@
Ambicios@
Amable
Convencional

## Sheet: sexismo ambivalente
Instrucciones: Puntúa cuán de acuerdo estás con las siguientes afirmaciones usando una escala de 1 a 6, donde 1 = totalmente en desacuerdo y 6 = totalmente de acuerdo
1. Un hombre no está verdaderamente completo sin el amor de una mujer
2. En nombre de la igualdad, muchas mujeres intentan conseguir ciertos privilegios
3. En catástrofes, las mujeres deberían ser rescatadas antes que los hombres
4. Muchas mujeres interpretan comentarios y acciones inocentes como sexistas
5. Las mujeres se ofenden fácilmente
6. Las personas pueden ser realmente felices sin necesidad de tener una pareja
7. Las feministas intentan que las mujeres tengan más poder que los hombres
8. Las mujeres se caracterizan por una pureza que pocos hombres poseen
9. Las mujeres deberían ser queridas y protegidas por los hombres
10. Las mujeres no valoran suficientemente todo lo que los hombres hacen por ellas
11. Las mujeres buscan ganar poder manipulando a los hombres
12. Todo hombre debería tener una mujer a quien amar
13. Una mujer está incompleta sin un hombre a su lado
14. Las mujeres exageran los problemas que tienen en el trabajo
15. La mujer busca comprometerse con un hombre para controlarlo
16. Generalmente, cuando una mujer es derrotada limpiamente se queja de haber sufrido discriminación
17. Una buena mujer debería ser puesta en un pedestal por su hombre
18. Muchas mujeres, para burlarse de los hombres, utilizan su apariencia sexual para atraerlos y después rechazarlos
19. Las mujeres poseen una mayor sensibilidad moral que los hombres
20. Los hombres deberían estar dispuestos a sacrificar su propio bienestar con el fin de proveer bienestar económico a las mujeres
21. Las mujeres están haciendo a los hombres demandas completamente irracionales
22. Las mujeres tienden a ser más refinadas y a tener un mejor gusto que los hombres

## Sheet: lenguaje sexista
Instrucciones: Lee las siguientes oraciones e informa de cuán sexista es el lenguaje usado utilizando una escala graduada de 1 a 7, donde 1 = no sexista, 4 = bastante sexista, y 7 = completamente sexista.
Todos los directivos de la empresa fueron a la comida de navidad.
Un grupo de investigadores de la UGR está realizando un estudio sobre el consumo de alcohol.
A la convención anual de enfermería han asistido más de 5.000 enfermeros.
Los asistentes a las conferencias aplaudieron las diferentes propuestas.
Espere a ser llamado por algún médico.
La profesora le dijo a los alumnos que entregaran el trabajo el próximo viernes.
Las cuidadoras reclaman sus derechos en la próxima manifestación.
Los niños se divierten en el parque.
Los biólogos estudian los organismos y su relación con el entorno.
Todos debemos permanecer unidos ante los retos.
El hombre inventó la rueda en el 5 milenio a. C.
Los alemanes son grandes apreciadores de cerveza.
Instrucciones: Puntúa cuán de acuerdo estás con las siguientes afirmaciones usando una escala de 1 a 7, donde 1 = no estoy de acuerdo, 4 = ni de acuerdo ni en desacuerdo y 7 = completamente de acuerdo:
Se debe promover el lenguaje inclusivo.
No deberíamos intentar forzar un cambio en la manera en la que la lengua española se habla y se escribe.
Si “El hombre” fue siempre la manera de referirnos a las personas en general, debería seguir usándose “El hombre” en referencia a la humanidad.
Debemos hacer esfuerzos diarios por eliminar el lenguaje sexista.
El cambio forzoso del lenguaje por motivos de igualdad de género y sexual demuestra una actitud autoritaria.
El lenguaje sexista refleja el trato sexista en la sociedad.
Las mujeres también deben estar representadas en los nombres de los oficios clásicamente masculinos, tal como en el caso de “jueza” o “presidenta”.
El profesorado que exige a sus alumnos el uso de un lenguaje inclusivo están forzando su visión política en sus alumnos.
Si cambiamos el lenguaje sexista, reduciremos el sexismo en la sociedad.
Aunque el cambio es difícil, debemos intentar eliminar el lenguaje sexista.
