# Supplementary material for: Exploring the nature of the gender-congruency effect: implicit gender activation and social bias
Source: Front Psychol. 2023 May 23;14:1160836. doi: 10.3389/fpsyg.2023.1160836 (PMC10242114; doi:10.3389/fpsyg.2023.1160836)
Supplement: Supplementary file 2 [file Data_Sheet_2.xlsx]

## Sheet: list_of_stimuli
Spanish word	English translation	Gender type	Grammatical Gender
graduados	graduates	Biological	Masculine
asesinos	assassins	Biological	Masculine
campesinos	farmers	Biological	Masculine
zurdos	left handed	Biological	Masculine
enemigos	enemies	Biological	Masculine
chicos	guys	Biological	Masculine
cuñados	brothers in law	Biological	Masculine
biólogos	biologists	Biological	Masculine
paisanos	countrymen	Biological	Masculine
inquilinos	tenants	Biological	Masculine
estudiosos	scholars	Biological	Masculine
puritanos	puritans	Biological	Masculine
sobrinos	nephews	Biological	Masculine
aldeanos	villagers	Biological	Masculine
suegros	fathers in law	Biological	Masculine
zoólogos	zoologists	Biological	Masculine
camareros	waiters	Biological	Masculine
músicos	musicians	Biological	Masculine
bisabuelos	grandparents	Biological	Masculine
delegados	delegates	Biological	Masculine
bibliotecarias	librarians	Biological	Feminine
señoras	ladies	Biological	Feminine
novias	girlfriends	Biological	Feminine
alumnas	female students	Biological	Feminine
repartidoras	delivery girls	Biological	Feminine
funcionarias	civil servants	Biological	Feminine
compañeras	companions	Biological	Feminine
extranjeras	foreigners	Biological	Feminine
pasajeras	passenger	Biological	Feminine
esposas	wives	Biological	Feminine
hermanas	sisters	Biological	Feminine
vecinas	neighbors	Biological	Feminine
abuelas	grandmothers	Biological	Feminine
reinas	queens	Biological	Feminine
princesas	princesses	Biological	Feminine
universitarias	undergraduates	Biological	Feminine
fanáticas	fans	Biological	Feminine
psicólogas	psychologists	Biological	Feminine
escritoras	writers	Biological	Feminine
socias	partners	Biological	Feminine
armeros	gunsmiths	Stereotypical	Masculine
ingenieros	engineers	Stereotypical	Masculine
comisarios	superintendents	Stereotypical	Masculine
bomberos	firefighters	Stereotypical	Masculine
sargentos	sergeants	Stereotypical	Masculine
mafiosos	mobsters	Stereotypical	Masculine
ganaderos	ranchers	Stereotypical	Masculine
mendigos	beggars	Stereotypical	Masculine
herreros	blacksmiths	Stereotypical	Masculine
filósofos	philosophers	Stereotypical	Masculine
barberos	barbers	Stereotypical	Masculine
médicos	doctors	Stereotypical	Masculine
políticos	politicians	Stereotypical	Masculine
mecánicos	mechanics	Stereotypical	Masculine
toreros	bullfighters	Stereotypical	Masculine
payasos	clowns	Stereotypical	Masculine
obreros	workers	Stereotypical	Masculine
cirujanos	surgeons	Stereotypical	Masculine
camioneros	truckers	Stereotypical	Masculine
ejecutivos	executives	Stereotypical	Masculine
enfermeras	nurses	Stereotypical	Feminine
maestras	teachers	Stereotypical	Feminine
peluqueras	hairdressers	Stereotypical	Feminine
cuidadoras	caregivers	Stereotypical	Feminine
secretarias	secretaries	Stereotypical	Feminine
limpiadoras	cleaners	Stereotypical	Feminine
niñeras	babysitters	Stereotypical	Feminine
cajeras	cashiers	Stereotypical	Feminine
criadas	maids	Stereotypical	Feminine
asistentas	assistants	Stereotypical	Feminine
bailarinas	ballerinas	Stereotypical	Feminine
colegialas	schoolgirls	Stereotypical	Feminine
cocineras	cooks	Stereotypical	Feminine
azafatas	hostesses	Stereotypical	Feminine
costureras	seamstresses	Stereotypical	Feminine
monitoras	instructors	Stereotypical	Feminine
patinadoras	skaters	Stereotypical	Feminine
brujas	witches	Stereotypical	Feminine
parteras	midwives	Stereotypical	Feminine
pescaderas	fishmongers	Stereotypical	Feminine
cocodrilos	crocodiles	Epicene	Masculine
sapos	toads	Epicene	Masculine
cuervos	crows	Epicene	Masculine
hipopótamos	hippos	Epicene	Masculine
leopardos	leopards	Epicene	Masculine
unicornios	unicorns	Epicene	Masculine
cangrejos	crabs	Epicene	Masculine
loros	parrots	Epicene	Masculine
armadillos	armadillos	Epicene	Masculine
murciélagos	bats	Epicene	Masculine
mosquitos	mosquitoes	Epicene	Masculine
bacalaos	cods	Epicene	Masculine
flamencos	flamingos	Epicene	Masculine
guepardos	cheetahs	Epicene	Masculine
pelícanos	pelicans	Epicene	Masculine
pingüinos	penguins	Epicene	Masculine
escarabajos	beetles	Epicene	Masculine
gusanos	worms	Epicene	Masculine
erizos	hedgehogs	Epicene	Masculine
babuinos	baboons	Epicene	Masculine
gaviotas	seagulls	Epicene	Feminine
comadrejas	weasels	Epicene	Feminine
tortugas	turtles	Epicene	Feminine
hormigas	ants	Epicene	Feminine
pirañas	piranhas	Epicene	Feminine
langostas	lobsters	Epicene	Feminine
alpacas	alpacas	Epicene	Feminine
ballenas	whales	Epicene	Feminine
arañas	spiders	Epicene	Feminine
cucarachas	cockroaches	Epicene	Feminine
mariposas	butterflies	Epicene	Feminine
libélulas	dragonflies	Epicene	Feminine
palomas	pigeons	Epicene	Feminine
jirafas	giraffes	Epicene	Feminine
golondrinas	swallows	Epicene	Feminine
gacelas	gazelles	Epicene	Feminine
ardillas	squirrels	Epicene	Feminine
medusas	jellyfishes	Epicene	Feminine
salamandras	salamanders	Epicene	Feminine
panteras	panthers	Epicene	Feminine
