# Supplementary material for: Exploring the nature of the gender-congruency effect: implicit gender activation and social bias
Source: Front Psychol. 2023 May 23;14:1160836. doi: 10.3389/fpsyg.2023.1160836 (PMC10242114; doi:10.3389/fpsyg.2023.1160836)
Supplement: Supplementary file 3 [file Data_Sheet_3.xlsx]

## Sheet: Main analysis
Mixed-models effects - main analysis
	Estimate	Std. Error	df	t value	Pr(>|t|)
(Intercept)	-0.937077	0.01841	42.9371	-50.9003	5.08235e-40
gender_type1	0.00867797	0.00365642	4476.36	2.37335	0.0176697
gender_type2	-0.00817859	0.0037868	4475.49	-2.15976	0.0308438
prime_gender1	0.00388461	0.00323205	43.3603	1.2019	0.235924
target_gender1	-0.00117324	0.00436388	43.5843	-0.268853	0.789311
version1	-0.0185588	0.0181192	42.8373	-1.02426	0.311463
trial.s	0.0109864	0.00262691	4525.15	4.18225	2.94105e-05
length.s	-0.00394567	0.00278299	4491.37	-1.41778	0.156325
freq.s	-0.00335286	0.00281027	4501.72	-1.19307	0.232905
gender_type1:prime_gender1	0.00519206	0.00370665	4475.99	1.40074	0.161361
gender_type2:prime_gender1	-0.00244109	0.0038106	4481.83	-0.640605	0.521812
gender_type1:target_gender1	0.0103079	0.00363813	4476.43	2.83331	0.00462753
gender_type2:target_gender1	-0.00647053	0.00375306	4482.3	-1.72407	0.0847645
prime_gender1:target_gender1	-0.0407116	0.00261911	4479.72	-15.5441	4.16032e-53
gender_type1:prime_gender1:target_gender1	0.00820682	0.00363761	4477.96	2.2561	0.0241124
gender_type2:prime_gender1:target_gender1	-0.00415349	0.00375199	4477.09	-1.10701	0.268349

## Sheet: Biological sex
Biological sex
	Estimate	Std. Error	df	t value	Pr(>|t|)
(Intercept)	-0.929928	0.021654	41.941	-42.9449	2.6886e-36
gender_type1	0.00748399	0.00421187	4466.55	1.77688	0.0756559
gender_type2	-0.0105274	0.00436711	4465.57	-2.41061	0.0159659
prime_gender1	0.00359037	0.00378741	41.4476	0.947977	0.348636
target_gender1	0.000471448	0.00509167	42.1651	0.092592	0.926666
sex1	-0.0136909	0.0217782	41.9704	-0.628651	0.532984
version1	-0.0167999	0.0183976	41.8424	-0.913159	0.366391
trial.s	0.0108058	0.00262899	4514.9	4.11025	4.02249e-05
length.s	-0.00399738	0.00278313	4481.48	-1.43629	0.15099
freq.s	-0.0034007	0.0028133	4491.4	-1.20879	0.226806
gender_type1:prime_gender1	0.00801711	0.00425561	4463.26	1.88389	0.0596443
gender_type2:prime_gender1	-0.00487865	0.00438522	4469.3	-1.11252	0.265975
gender_type1:target_gender1	0.0109652	0.00419666	4463.41	2.61284	0.00900939
gender_type2:target_gender1	-0.00672791	0.00433906	4470.33	-1.55055	0.121081
prime_gender1:target_gender1	-0.0377078	0.00302125	4470.84	-12.4808	3.63853e-35
gender_type1:sex1	0.00246423	0.00419489	4466.97	0.587435	0.556941
gender_type2:sex1	0.00459201	0.00433306	4465.34	1.05976	0.289311
prime_gender1:sex1	0.00057466	0.00377413	40.8702	0.152263	0.879729
target_gender1:sex1	-0.00319457	0.00509177	42.1685	-0.627399	0.533781
gender_type1:prime_gender1:target_gender1	0.00930869	0.00419546	4466.77	2.21875	0.0265537
gender_type2:prime_gender1:target_gender1	-0.00593866	0.00433471	4468.09	-1.37003	0.170748
gender_type1:prime_gender1:sex1	-0.00564901	0.00419526	4462.89	-1.34652	0.178202
gender_type2:prime_gender1:sex1	0.00495991	0.00433322	4467.02	1.14462	0.252427
gender_type1:target_gender1:sex1	-0.00113433	0.00419709	4463.64	-0.270266	0.786968
gender_type2:target_gender1:sex1	0.000578619	0.00433891	4470.78	0.133356	0.893918
prime_gender1:target_gender1:sex1	-0.0059197	0.00302125	4470.88	-1.95936	0.0501331
gender_type1:prime_gender1:target_gender1:sex1	-0.00236355	0.0041959	4466.69	-0.563301	0.573258
gender_type2:prime_gender1:target_gender1:sex1	0.00362174	0.00433641	4468.34	0.835193	0.403654

## Sheet: BEM
BEM sex-role inventory
	Estimate	Std. Error	df	t value	Pr(>|t|)
(Intercept)	-0.942446	0.0210991	36.9495	-44.6675	9.25894e-34		CONTRASTS
gender_type1	0.00943107	0.00400412	4172.77	2.35534	0.0185517		f1: masculine
gender_type2	-0.00698107	0.00415592	4173.83	-1.67979	0.0930734		f2: feminine
prime_gender1	0.00506916	0.0028915	4186.11	1.75313	0.0796536		f3: androgen
target_gender1	0.000339477	0.00487435	37.9489	0.0696456	0.944841		baseline: indifferenciate
BEM.f1	0.0011565	0.0386814	36.9699	0.0298982	0.976309
BEM.f2	0.0355914	0.0302031	36.9573	1.1784	0.246168
BEM.f3	-0.00879596	0.0386698	36.9259	-0.227463	0.821318
version1	-0.0179345	0.0200589	36.8578	-0.894092	0.377074
trial.s	0.0143663	0.00271131	4191.76	5.29864	1.2266e-07
length.s	-0.00345358	0.00287152	4183.53	-1.2027	0.22916
freq.s	-0.0028931	0.00290358	4192.17	-0.99639	0.319118
gender_type1:prime_gender1	0.00448911	0.00405085	4172.62	1.10819	0.267844
gender_type2:prime_gender1	-0.00112976	0.00417949	4176.56	-0.270311	0.786934
gender_type1:target_gender1	0.0112787	0.0039849	4171.66	2.83035	0.00467197
gender_type2:target_gender1	-0.00713318	0.00412529	4172.63	-1.72914	0.0838586
prime_gender1:target_gender1	-0.0417081	0.00287571	4173.16	-14.5036	1.53194e-46
gender_type1:BEM.f1	-0.000161889	0.00731334	4173.39	-0.0221361	0.98234
gender_type2:BEM.f1	-0.00262714	0.00755648	4172.8	-0.347667	0.728108
gender_type1:BEM.f2	-0.00266233	0.00569313	4173.47	-0.46764	0.640067
gender_type2:BEM.f2	0.00015941	0.00586233	4173.96	0.0271922	0.978308
gender_type1:BEM.f3	-0.00660351	0.00716878	4172.41	-0.921148	0.357027
gender_type2:BEM.f3	-0.0049055	0.00743834	4175.16	-0.659489	0.509618
prime_gender1:BEM.f1	0.0155805	0.00525999	4178.15	2.96209	0.00307283
prime_gender1:BEM.f2	-0.000867025	0.00409253	4181.43	-0.211855	0.83223
prime_gender1:BEM.f3	-0.0044338	0.00517637	4176.75	-0.856545	0.391745
target_gender1:BEM.f1	0.0182416	0.0088987	38.2272	2.04991	0.0472779
target_gender1:BEM.f2	-0.00627134	0.00694629	37.9137	-0.902833	0.372315
target_gender1:BEM.f3	-0.0070672	0.00884824	37.3789	-0.798712	0.429503
gender_type1:prime_gender1:target_gender1	0.011351	0.00398406	4172.81	2.84911	0.00440559
gender_type2:prime_gender1:target_gender1	-0.00418089	0.00412285	4171.61	-1.01408	0.310604
gender_type1:prime_gender1:BEM.f1	0.00583192	0.00731359	4172.34	0.797409	0.425259
gender_type2:prime_gender1:BEM.f1	0.00164817	0.0075565	4174.08	0.218113	0.827352
gender_type1:prime_gender1:BEM.f2	0.00143612	0.00569292	4172.97	0.252263	0.80085
gender_type2:prime_gender1:BEM.f2	-0.00611055	0.00586457	4176.26	-1.04194	0.297499
gender_type1:prime_gender1:BEM.f3	-0.00479686	0.00717137	4172.24	-0.668891	0.503602
gender_type2:prime_gender1:BEM.f3	-0.00834069	0.00743979	4175.39	-1.12109	0.262313
gender_type1:target_gender1:BEM.f1	-0.00410483	0.00731453	4172	-0.561188	0.574699
gender_type2:target_gender1:BEM.f1	0.0093239	0.00755777	4173.52	1.23368	0.21739
gender_type1:target_gender1:BEM.f2	-0.00524808	0.0056948	4172.44	-0.921556	0.356814
gender_type2:target_gender1:BEM.f2	3.26351e-05	0.00586507	4172.77	0.00556431	0.995561
gender_type1:target_gender1:BEM.f3	-0.00620882	0.00717063	4170.76	-0.865867	0.386613
gender_type2:target_gender1:BEM.f3	-0.00330729	0.00744187	4172.33	-0.444417	0.656764
prime_gender1:target_gender1:BEM.f1	0.00414818	0.00526482	4172.31	0.787905	0.430797
prime_gender1:target_gender1:BEM.f2	0.00162811	0.00409464	4174.04	0.397619	0.690931
prime_gender1:target_gender1:BEM.f3	-0.00394088	0.0051797	4172.02	-0.76083	0.446802
gender_type1:prime_gender1:target_gender1:BEM.f1	0.000667071	0.00731339	4172.75	0.0912124	0.927328
gender_type2:prime_gender1:target_gender1:BEM.f1	0.000942575	0.00755758	4172.31	0.124719	0.900752
gender_type1:prime_gender1:target_gender1:BEM.f2	-0.00817401	0.00569606	4172.77	-1.43503	0.151354
gender_type2:prime_gender1:target_gender1:BEM.f2	0.000679492	0.0058648	4172.32	0.115859	0.90777
gender_type1:prime_gender1:target_gender1:BEM.f3	0.00537439	0.00717239	4173.8	0.749317	0.453708
gender_type2:prime_gender1:target_gender1:BEM.f3	-0.00865487	0.00744204	4171.49	-1.16297	0.244908

## Sheet: Sexism benevolent
Benevolent sexism
	Estimate	Std. Error	df	t value	Pr(>|t|)
(Intercept)	-0.938476	0.0521315	38.9722	-18.0021	1.74209e-20
gender_type1	0.00249578	0.00995635	4191.85	0.250672	0.80208
gender_type2	-0.00983588	0.0103113	4193.9	-0.953896	0.340191
prime_gender1	0.00921898	0.00718219	4209.19	1.28359	0.199357
target_gender1	-0.00924734	0.0124756	39.8764	-0.741233	0.462896
sex_lang_ben_log	0.00603815	0.0670591	38.9596	0.0900422	0.928715
version1	-0.0181459	0.0194734	38.9013	-0.931831	0.357171
trial.s	0.0147187	0.00270842	4212.08	5.43443	5.80773e-08
length.s	-0.00340476	0.00287347	4203.54	-1.1849	0.236126
freq.s	-0.00297293	0.00290325	4212.26	-1.024	0.305892
gender_type1:prime_gender1	-0.00201135	0.0099742	4192.27	-0.201655	0.840196
gender_type2:prime_gender1	-0.00554218	0.0103169	4194.16	-0.537196	0.591161
gender_type1:target_gender1	0.00608024	0.00995135	4191.51	0.610997	0.541235
gender_type2:target_gender1	-0.00180574	0.0102968	4192.32	-0.175369	0.860798
prime_gender1:target_gender1	-0.0440129	0.00718263	4196.42	-6.12769	9.73581e-10
gender_type1:sex_lang_ben_log	0.0085659	0.0127699	4192.34	0.670787	0.502393
gender_type2:sex_lang_ben_log	0.00400416	0.0132139	4195.28	0.303026	0.761885
prime_gender1:sex_lang_ben_log	-0.00628869	0.00919941	4203.56	-0.683598	0.494267
target_gender1:sex_lang_ben_log	0.0108285	0.0160307	39.7301	0.675482	0.503282
gender_type1:prime_gender1:target_gender1	-0.00437239	0.00995077	4192.59	-0.439403	0.660392
gender_type2:prime_gender1:target_gender1	-0.00368206	0.0102969	4191.77	-0.357588	0.72067
gender_type1:prime_gender1:sex_lang_ben_log	0.00954287	0.0127691	4192.47	0.747341	0.4549
gender_type2:prime_gender1:sex_lang_ben_log	0.00387908	0.013209	4193.97	0.29367	0.769025
gender_type1:target_gender1:sex_lang_ben_log	0.00535239	0.0127683	4191.2	0.419193	0.675096
gender_type2:target_gender1:sex_lang_ben_log	-0.00730252	0.0132155	4192.42	-0.552572	0.580586
prime_gender1:target_gender1:sex_lang_ben_log	0.00350021	0.00920668	4194.86	0.380182	0.70383
gender_type1:prime_gender1:target_gender1:sex_lang_ben_log	0.0191037	0.0127693	4193.49	1.49606	0.134713
gender_type2:prime_gender1:target_gender1:sex_lang_ben_log	-0.000400631	0.0132117	4191.37	-0.030324	0.97581

## Sheet: Sexism Hostile
Hostile sexism
	Estimate	Std. Error	df	t value	Pr(>|t|)
(Intercept)	-0.959779	0.028176	39.1036	-34.0637	1.09913e-30
gender_type1	0.00802866	0.00538232	4193.63	1.49167	0.13586
gender_type2	-0.00782775	0.00556	4192.34	-1.40787	0.159244
prime_gender1	3.29978e-06	0.00387855	4201.3	0.000850778	0.999321
target_gender1	-0.0123264	0.00635639	39.433	-1.93922	0.0596535
sex_lang_host_log	0.0634657	0.0505004	39.2195	1.25674	0.216283
version1	-0.0109981	0.0192932	38.8244	-0.570049	0.571929
trial.s	0.0146608	0.00270594	4215.07	5.41802	6.36235e-08
length.s	-0.00340714	0.00287127	4204.94	-1.18663	0.235439
freq.s	-0.00306987	0.00290438	4214.25	-1.05698	0.290582
gender_type1:prime_gender1	0.00491207	0.00541937	4194.94	0.906391	0.364781
gender_type2:prime_gender1	-0.000684924	0.0055826	4198.54	-0.122689	0.902359
gender_type1:target_gender1	0.014083	0.00537172	4192.5	2.6217	0.00878086
gender_type2:target_gender1	-0.00494509	0.00554133	4192.83	-0.892402	0.372229
prime_gender1:target_gender1	-0.0471918	0.00386615	4193.5	-12.2064	1.06489e-33
gender_type1:sex_lang_host_log	0.00181427	0.00963233	4195.75	0.188353	0.850609
gender_type2:sex_lang_host_log	0.00174485	0.00986229	4195.8	0.176922	0.859578
prime_gender1:sex_lang_host_log	0.0118338	0.00690462	4195.86	1.7139	0.0866213
target_gender1:sex_lang_host_log	0.0272259	0.0112929	40.0217	2.41088	0.0205974
gender_type1:prime_gender1:target_gender1	0.00508153	0.00537009	4191.93	0.946266	0.344067
gender_type2:prime_gender1:target_gender1	-0.00332206	0.00553951	4192.36	-0.599702	0.548737
gender_type1:prime_gender1:sex_lang_host_log	-0.000159268	0.00963387	4195.57	-0.0165321	0.986811
gender_type2:prime_gender1:sex_lang_host_log	-0.00533793	0.00986104	4195.8	-0.541315	0.588319
gender_type1:target_gender1:sex_lang_host_log	-0.0100246	0.00963979	4192.98	-1.03992	0.298439
gender_type2:target_gender1:sex_lang_host_log	-0.00570945	0.0098759	4193.86	-0.578119	0.563215
prime_gender1:target_gender1:sex_lang_host_log	0.0144763	0.00690527	4193.87	2.09641	0.0361057
gender_type1:prime_gender1:target_gender1:sex_lang_host_log	0.0107511	0.00963735	4195.74	1.11557	0.264671
gender_type2:prime_gender1:target_gender1:sex_lang_host_log	-0.00190067	0.00986425	4192.65	-0.192683	0.847217

## Sheet: Sexist language
Sexist language
	Estimate	Std. Error	df	t value	Pr(>|t|)
(Intercept)	-0.936681	0.019174	39.0064	-48.8516	1.33274e-36
gender_type1	0.00865007	0.0037802	4192.74	2.28825	0.0221723
gender_type2	-0.00708397	0.00391529	4193.63	-1.80931	0.0704743
prime_gender1	0.0043061	0.00272582	4203.2	1.57974	0.114242
target_gender1	-0.00189365	0.00460551	39.5044	-0.41117	0.68317
sex_lang.s	-0.0303676	0.0189515	39.0447	-1.60238	0.117132
version1	-0.0165253	0.0186882	38.9146	-0.884262	0.381986
trial.s	0.0146497	0.00270443	4212.35	5.41692	6.40185e-08
length.s	-0.00339232	0.00287107	4204.23	-1.18155	0.237449
freq.s	-0.00294039	0.00290152	4213.36	-1.0134	0.310929
gender_type1:prime_gender1	0.00460861	0.00383135	4193.74	1.20287	0.229095
gender_type2:prime_gender1	-0.00230348	0.0039412	4198.06	-0.584462	0.558941
gender_type1:target_gender1	0.0102585	0.00376059	4192.22	2.72789	0.0064006
gender_type2:target_gender1	-0.0071463	0.00388085	4192.63	-1.84143	0.0656297
prime_gender1:target_gender1	-0.0417923	0.00270866	4194.23	-15.4291	2.7787e-52
gender_type1:sex_lang.s	-0.00105688	0.0037655	4196.6	-0.280674	0.778974
gender_type2:sex_lang.s	-0.00178522	0.00383904	4195.93	-0.465016	0.641944
prime_gender1:sex_lang.s	-0.00578742	0.00268885	4194.04	-2.15238	0.0314246
target_gender1:sex_lang.s	-0.00695321	0.00455664	39.9675	-1.52595	0.134897
gender_type1:prime_gender1:target_gender1	0.0091215	0.00376058	4193.19	2.42555	0.015327
gender_type2:prime_gender1:target_gender1	-0.0038464	0.00388102	4192.03	-0.991081	0.321703
gender_type1:prime_gender1:sex_lang.s	-0.00313244	0.00376536	4192.98	-0.831909	0.405508
gender_type2:prime_gender1:sex_lang.s	0.00540744	0.00383896	4195.3	1.40857	0.159037
gender_type1:target_gender1:sex_lang.s	0.00364759	0.00376604	4194.83	0.968547	0.332827
gender_type2:target_gender1:sex_lang.s	-0.000476046	0.00384037	4194.03	-0.123958	0.901354
prime_gender1:target_gender1:sex_lang.s	-0.00457069	0.00268883	4193.73	-1.69988	0.0892272
gender_type1:prime_gender1:target_gender1:sex_lang.s	-0.00310757	0.00376468	4196.27	-0.825453	0.409162
gender_type2:prime_gender1:target_gender1:sex_lang.s	0.0016042	0.00383953	4193.22	0.417812	0.676106
