# Supplementary material for: Exploring the nature of the gender-congruency effect: implicit gender activation and social bias
Source: Front Psychol. 2023 May 23;14:1160836. doi: 10.3389/fpsyg.2023.1160836 (PMC10242114; doi:10.3389/fpsyg.2023.1160836)
Supplement: Supplementary file 4 [file Data_Sheet_4.xlsx]

## Sheet: biological sex
biological sex
	Sum Sq	Mean Sq	NumDF	DenDF	F value	Pr(>F)
gender_type	0.1958	0.0979	2	4466.6	3.1364	0.04354 *
prime_gender	0.0281	0.0281	1	41.4	0.8987	0.34864
target_gender	0.0003	0.0003	1	42.2	0.0086	0.92667
biological_sex	0.0123	0.0123	1	42.0	0.3952	0.53298
version	0.0260	0.0260	1	41.8	0.8339	0.36639
trial.s	0.5274	0.5274	1	4514.9	16.8941	0.00004022 ***
length.s	0.0644	0.0644	1	4481.5	2.0629	0.15099
freq.s	0.0456	0.0456	1	4491.4	1.4612	0.22681
gender_type:prime_gender	0.1118	0.0559	2	4466.4	1.7911	0.16689
gender_type:target_gender	0.2158	0.1079	2	4467.6	3.4556	0.03165 *
prime_gender:target_gender	4.8629	4.8629	1	4470.8	155.7716	<0.0001 ***
gender_type:biological_sex	0.0864	0.0432	2	4466.4	1.3845	0.25056
prime_gender:biological_sex	0.0007	0.0007	1	40.9	0.0232	0.87973
target_gender:biological_sex	0.0123	0.0123	1	42.2	0.3936	0.53378
gender_type:prime_gender:target_gender	0.1567	0.0783	2	4467.5	2.5094	0.08143 .
gender_type:prime_gender:biological_sex	0.0660	0.0330	2	4465.3	1.0571	0.34754
gender_type:target_gender:biological_sex	0.0023	0.0011	2	4467.8	0.0365	0.96414
prime_gender:target_gender:biological_sex	0.1198	0.1198	1	4470.9	3.8391	0.05013 *
gender_type:prime_gender:target_gender:biological_sex	0.0227	0.0113	2	4467.7	0.3634	0.69530

## Sheet: BEM
BEM score
	Sum Sq	Mean Sq	NumDF	DenDF	F value	Pr(>F)
gender_type	0.1826	0.0913	2	4173.4	2.9528	0.05230 .
prime_gender	0.0950	0.0950	1	4186.1	3.0735	0.07965 .
target_gender	0.0001	0.0001	1	37.9	0.0049	0.94484
BEM.f	0.0498	0.0166	3	37.0	0.5374	0.65961
version	0.0247	0.0247	1	36.9	0.7994	0.37707
trial.s	0.8681	0.8681	1	4191.8	28.0756	0.0000001227 ***
length.s	0.0447	0.0447	1	4183.5	1.4465	0.22916
freq.s	0.0307	0.0307	1	4192.2	0.9928	0.31912
gender_type:prime_gender	0.0416	0.0208	2	4174.8	0.6725	0.51049
gender_type:target_gender	0.2519	0.1260	2	4171.9	4.0735	0.01708 *
prime_gender:target_gender	6.5040	6.5040	1	4173.2	210.3540	<0.00001***
gender_type:BEM.f	0.1797	0.0300	6	4173.3	0.9687	0.44470
prime_gender:BEM.f	0.2943	0.0981	3	4184.9	3.1732	0.02323 *
target_gender:BEM.f	0.1351	0.0450	3	37.9	1.4562	0.24184
gender_type:prime_gender:target_gender	0.2576	0.1288	2	4172.1	4.1661	0.01558 *
gender_type:prime_gender:BEM.f	0.1986	0.0331	6	4174.0	1.0704	0.37778
gender_type:target_gender:BEM.f	0.2043	0.0340	6	4172.0	1.1011	0.35894
prime_gender:target_gender:BEM.f	0.0335	0.0112	3	4173.2	0.3614	0.78088
gender_type:prime_gender:target_gender:BEM.f	0.1347	0.0224	6	4172.2	0.7260	0.62865

## Sheet: Benevolent sexism
benevolent_sexism
	Sum Sq	Mean Sq	NumDF	DenDF	F value	Pr(>F)
gender_type	0.03029	0.01515	2	4192.7	0.4890	0.6133
prime_gender	0.05104	0.05104	1	4209.2	1.6476	0.1994
target_gender	0.01702	0.01702	1	39.9	0.5494	0.4629
benevolent_sexism	0.00025	0.00025	1	39.0	0.0081	0.9287
version	0.02690	0.02690	1	38.9	0.8683	0.3572
trial.s	0.91486	0.91486	1	4212.1	29.5331	0.00001***
length.s	0.04349	0.04349	1	4203.5	1.4040	0.2361
freq.s	0.03248	0.03248	1	4212.3	1.0486	0.3059
gender_type:prime_gender	0.01815	0.00907	2	4193.8	0.2929	0.7461
gender_type:target_gender	0.01227	0.00613	2	4191.9	0.1980	0.8204
prime_gender:target_gender	1.16316	1.16316	1	4196.4	37.5486	0.00001***
gender_type:benevolent_sexism	0.03078	0.01539	2	4193.6	0.4967	0.6086
prime_gender:benevolent_sexism	0.01448	0.01448	1	4203.6	0.4673	0.4943
target_gender:benevolent_sexism	0.01413	0.01413	1	39.7	0.4563	0.5033
gender_type:prime_gender:target_gender	0.01975	0.00988	2	4192.3	0.3188	0.7270
gender_type:prime_gender:benevolent_sexism	0.03567	0.01784	2	4193.6	0.5758	0.5623
gender_type:target_gender:benevolent_sexism	0.01030	0.00515	2	4191.8	0.1663	0.8468
prime_gender:target_gender:benevolent_sexism	0.00448	0.00448	1	4194.9	0.1445	0.7038
gender_type:prime_gender:target_gender:benevolent_sexism	0.09054	0.04527	2	4192.7	1.4614	0.2320

## Sheet: Hostile sexism
hostile_sexism
	Sum Sq	Mean Sq	NumDF	DenDF	F value	Pr(>F)
gender_type	0.0873	0.0437	2	4192.8	1.4115	0.24388
prime_gender	0.0000	0.0000	1	4201.3	0.0000	0.99932
target_gender	0.1163	0.1163	1	39.4	3.7606	0.05965 .
hostile_sexism	0.0489	0.0489	1	39.2	1.5794	0.21628
version	0.0101	0.0101	1	38.8	0.3250	0.57193
trial.s	0.9080	0.9080	1	4215.1	29355	0.000001 ***
length.s	0.0436	0.0436	1	4204.9	1.4081	0.23544
freq.s	0.0346	0.0346	1	4214.2	1.1172	0.29058
gender_type:prime_gender	0.0300	0.0150	2	4196.5	0.4852	0.61562
gender_type:target_gender	0.2195	0.1098	2	4192.3	3.5483	0.02886 *
prime_gender:target_gender	4.6088	4.6088	1	4193.5	148.99	<0.00001 ***
gender_type:hostile_sexism	0.0041	0.0020	2	4195.0	0.0661	0.93602
prime_gender:hostile_sexism	0.0909	0.0909	1	4195.9	2.9374	0.08662 .
target_gender:hostile_sexism	0.1798	0.1798	1	40.0	5.8123	0.02060 *
gender_type:prime_gender:target_gender	0.0284	0.0142	2	4192.1	0.4590	0.63194
gender_type:prime_gender:hostile_sexism	0.0124	0.0062	2	4195.8	0.2001	0.81864
gender_type:target_gender:hostile_sexism	0.0826	0.0413	2	4193.0	1.3348	0.26331
prime_gender:target_gender:hostile_sexism	0.1359	0.1359	1	4193.9	4.3949	0.03611 *
gender_type:prime_gender:target_gender:hostile_sexism	0.0438	0.0219	2	4193.8	0.7075	0.49295

## Sheet: Sexist language
sexist_language
	Sum Sq	Mean Sq	NumDF	DenDF	F value	Pr(>F)
gender_type	0.1812	0.0906	2	4193.3	2.9283	0.05360 .
prime_gender	0.0772	0.0772	1	4203.2	2.4956	0.11424
target_gender	0.0052	0.0052	1	39.5	0.1691	0.68317
sexist_lang	0.0794	0.0794	1	39.0	2.5676	0.11713
version	0.0242	0.0242	1	38.9	0.7819	0.38199
trial.s	0.9077	0.9077	1	4212.3	29.3430	0.00000006402 ***
length.s	0.0432	0.0432	1	4204.2	1.3961	0.23745
freq.s	0.0318	0.0318	1	4213.4	1.0270	0.31093
gender_type:prime_gender	0.0448	0.0224	2	4195.7	0.7241	0.48484
gender_type:target_gender	0.2398	0.1199	2	4192.1	3.8767	0.02079 *
prime_gender:target_gender	7.3642	7.3642	1	4194.2	238.0582	<0.0001 ***
gender_type:sexist_lang	0.0175	0.0088	2	4195.4	0.2835	0.75313
prime_gender:sexist_lang	0.1433	0.1433	1	4194.0	4.6327	0.03142 *
target_gender:sexist_lang	0.0720	0.0720	1	40.0	2.3285	0.13490
gender_type:prime_gender:target_gender	0.1839	0.0919	2	4192.4	2.9723	0.05129 .
gender_type:prime_gender:sexist_lang	0.0621	0.0310	2	4194.2	1.0030	0.36688
gender_type:target_gender:sexist_lang	0.0344	0.0172	2	4193.6	0.5555	0.57384
prime_gender:target_gender:sexist_lang	0.0894	0.0894	1	4193.7	2.8896	0.08923 .
gender_type:prime_gender:target_gender:sexist_lang	0.0211	0.0105	2	4193.8	0.3407	0.71129

## Sheet: BEM-means
Bem means
SEX-ROLE
MASCULINE			FEMININE			ANDROGEN			INDIFFERENCE
EPICENE	FEM target	MAS target	EPICENE	FEM target	MAS target	EPICENE	FEM target	MAS target	EPICENE	FEM target	MAS target
FEM prime	499.445	499.445	FEM prime	485.437	527.55	FEM prime	459.653	490.731	FEM prime	467.775	475.185
MAS prime	493.421	443.787	MAS prime	515.464	475.185	MAS prime	488.599	461.066	MAS prime	502.232	449.55
pairwise	z = -0.361; p = 0.718	z = 3.890; p = 0.0001	pairwise	z = -2.702 p = 0.0069	z = 4.805; p = 0.0001	pairwise	z = -2.009; p = 0.0446	z = 2.042 p = 0.0412	pairwise	z = -2.292; p = 0.0219	z = 1.808; p = 0.0706
effect size	0.0617	0.6428	effect size	-0.3045	0.5349	effect size	-0.3253	0.3327	effect size	-0.3782	0.3056
BIOLOGICAL	FEM target	MAS target	BIOLOGICAL	FEM target	MAS target	BIOLOGICAL	FEM target	MAS target	BIOLOGICAL	FEM target	MAS target
FEM prime	464.876	503.356	FEM prime	475.687	525.088	FEM prime	457.782	510.783	FEM prime	413.983	483.871
MAS prime	502.793	447.316	MAS prime	513.113	475.185	MAS prime	497.788	449.55	MAS prime	484.392	444.664
pairwise	z = -2.407; p= 0.0161	z = 3.664; p = 0.0002	pairwise	z = -3.346; p= 0.0008	z = 4.522; p = 0.0001	pairwise	z = -2.579; p= 0.0099	z = 4.000 p = 0.0001	pairwise	z = -5.095; p= 0.0001	z = 2.674; p = 0.0075
effect size	-0.4155	0.6387	effect size	-0.3894	0.5149	effect size	-0.4450	0.6819	effect size	-0.8961	0.4661
STEREOTYPICAL	FEM target	MAS target	STEREOTYPICAL	FEM target	MAS target	STEREOTYPICAL	FEM target	MAS target	STEREOTYPICAL	FEM target	MAS target
FEM prime	473.684	494.505	FEM prime	462.487	523.256	FEM prime	429.799	502.232	FEM prime	440.313	497.238
MAS prime	494.505	435.624	MAS prime	511.364	478.215	MAS prime	492.881	452.261	MAS prime	472.193	450.45
pairwise	z = -1.230; p = 0.2189	z= 3.968; p = 0.0001	pairwise	z = -4.435; p = 0.0001	z= 3.960; p = 0.0001	pairwise	z = -4.33; p = 0.0001	z= 3.237; p = 0.0012	pairwise	z = -2.135; p = 0.0328	z= 3.028; p = 0.0025
effect size	—0.2233	0.7048	effect size	-0.5303	0.4611	effect size	-0.7657	0.5647	effect size	-0.3893	0.5363
	Male	Female
Androgino	5	6
Feminine	0	20
Indiferencia	2	10
Masculine	2	6
